1 **Leaf trichome distribution pattern in *Arabidopsis* reveals gene**  
2 **expression variation associated with environmental adaptation**

3

4

5 Shotaro Okamoto<sup>1</sup>, Kohei Negishi<sup>1</sup>, Yuko Toyama<sup>1</sup>, Takeo Ushijima<sup>2</sup>, Kengo Morohashi<sup>1\*¶</sup>

6

7

8 <sup>1</sup>Faculty of Science and Technology, Department of Applied Biological Science, Tokyo

9 University of Science, 2641 Yamazaki, Noda, Chiba 278-8510, Japan; j6413024@gmail.com

10 (S.O.); k.negishi0705@gmail.com (K.N.); yuko.toyama.29@gmail.com (Y.T.);

11 morohashi.1@rs.tus.ac.jp (K.M.)

12 <sup>2</sup>Faculty of Science and Technology, Department of Mathematics, Tokyo University of

13 Science, 2641 Yamazaki, Noda, Chiba 278-8510, Japan;

14 ushijima\_takeo@ma.noda.tus.ac.jp (U.T.)

15

16 <sup>¶</sup>Present address, Department of Biochemistry and Molecular Biology, Michigan State

17 University, East Lansing, MI, 48824, USA.

18

19 \*Correspondence: morohashi.1@rs.noda.tus.ac.jp; Tel.: +1-614-407-6676

20

21 **Keywords:** Gene expression variation, Environmental adaptation, *Arabidopsis thaliana*

22

23 **Abstract**

24 Gene expression varies stochastically even in both heterogenous and homogeneous cell  
25 populations. This variation is not simply useless noise; rather, it is important for many  
26 biological processes. Unicellular organisms or cultured cell lines are useful for analyzing the  
27 variation in gene expression between cells; however, owing to technical challenges, the  
28 biological relevance of this variation in multicellular organisms such as higher plants remains  
29 unclear. Here, we addressed the biological relevance of this variation between cells by  
30 examining the genetic basis of trichome distribution patterns in *Arabidopsis thaliana*. The  
31 distribution pattern of a trichome on a leaf is stochastic and can be mathematically  
32 represented using Turing's reaction-diffusion (RD) model. We analyzed simulations based  
33 on the RD model and found that the variability in the trichome distribution pattern increased  
34 with the increase in stochastic variation in a particular gene expression. Moreover,  
35 differences in heat-dependent variability of the trichome distribution pattern between the  
36 accessions showed a strong correlation with environmental factors to which each accession  
37 was adapted. Taken together, we successfully visualized variations in gene expression by  
38 quantifying the variability in the *Arabidopsis* trichome distribution pattern. Thus, our data  
39 provide evidence for the biological importance of variations in gene expression for  
40 environmental adaptation.

## 41 1. Introduction

42 A genetically identical population can exhibit phenotypic variation arising from subtle  
43 differences in gene expression [1,2]. Gene expression is modulated by intrinsic  
44 developmental cues and environmental stimuli, and stochastic fluctuations in gene  
45 expression are important for many biological processes including environmental stress  
46 response, survival, and adaptation [2,3]. Unicellular organisms (e.g., bacteria) or single cells  
47 (e.g., cultured mammalian cell lines) are useful for studying variation in gene expression  
48 between cells [4]. For instance, embryonic stem cells exhibit significant heterogeneity in  
49 gene expression [5].

50         Adaptation to specific environmental factors such as light and temperature is  
51 essential for plants and requires a system for controlling variation in gene expression.  
52 Recent studies have investigated stochastic variations in plant phenotype such as  
53 phyllotactic patterning and the timing of epidermal cell division in the sepal [6,7]. The  
54 findings of these studies suggest that such variations can be beneficial for plants, although  
55 the precise underlying mechanisms remain unknown [6,8-11].

56         Single-cell transcriptomics is currently the main method used to measure variation in  
57 gene expression between cells. However, single-cell transcriptomics is costly, and  
58 separating plant cells from organs requires enzymatic treatment, which can artificially alter  
59 gene expression profiles. Although variation in gene expression in higher order multicellular  
60 organisms was recently measured, differences of gene expression variation between genes  
61 has not yet been demonstrated [11]. The trichome, a hair-shaped organ that develops from a  
62 pluripotent epidermal cell at an early stage of leaf development, performs multiple functions  
63 including herbivore defense, leaf moisture retention, and metabolite secretion. Trichomes  
64 serve as a useful trait for studying environmental adaptation in plants. The distribution  
65 pattern of leaf trichomes in *Arabidopsis thaliana* is a suitable system for investigating  
66 variation in gene expression in plants for the following reasons. First, the trichome position  
67 on a leaf is equally and probabilistically distributed [10,12,13], thus, the trichome distribution  
68 pattern is believed to emerge stochastically. Second, the gene regulatory network related to

69 trichome development has been well studied [14-16]; *GLABRA 3* (*GL3*), which encodes a  
70 basic helix-loop-helix transcription factor, is critical for cell fate determination during trichome  
71 formation. The *GL3* protein forms a complex with *GL1*, an R2R3-MYB transcription factor, to  
72 control the expression of downstream genes. The *GL3-GL1* complex activates not only  
73 positive regulators of trichome cell fate determination, but also R3-MYB transcription factors  
74 that directly interact with *GL3* in neighboring cells to inhibit the formation of the *GL3-GL1*  
75 complex. Consequently, these cells do not form trichomes. Third, the trichome distribution  
76 pattern is explained by Turing's reaction-diffusion (RD) model [13,17,18], and a trichome  
77 distribution pattern was mathematically and experimentally demonstrated [19] (Fig. 1A).  
78 Since the pattern formation required stochastic fluctuations, the previously proposed RD  
79 model uniformly added a stochastic noise. However, in the model, the variations in individual  
80 factors were neglected. We speculated that differences in gene expression between  
81 epidermal cells immediately before trichome cell fate determination can affect the trichome  
82 distribution pattern (Fig 1B). To predict the effect of variations in gene expression between  
83 epidermal cells on trichome development, a proper mathematical model and further  
84 experiments are needed.

85         In this study we investigated the factors affecting the range of variability in gene  
86 expression between individual cells, and by performing experiments using fresh leaf  
87 material. We visualized heterogeneity in *GL3* expression, which correlated with the regularity  
88 of the trichome distribution pattern. We found that variations in gene expression were  
89 affected by histone modifications and ambient temperature, and were correlated with the  
90 mean annual temperature of the habitat of *A. thaliana* accessions. While our approach  
91 consists of both intrinsic and extrinsic variations, our model enables the quantification of  
92 gene expression variation and provides a basis for investigating the role of gene expression  
93 variation in environmental adaptation.

94

## 95 **2. Results**

96 *2.1 Computational simulation of the effect of variation in gene expression on trichome*  
97 *patterning*

98 We hypothesized that the leaf trichome distribution pattern is determined by  
99 differences in gene expression between individual epidermal cells. To test this hypothesis,  
100 we first established a method for quantifying the trichome distribution pattern. Trichome  
101 positions on a mature leaf are stable; i.e., the distribution of trichomes on a leaf is  
102 considered as a regular pattern. We measured the distance between the two closest  
103 trichomes (next-neighbor distance [ND]) and examined the distribution of NDs of all  
104 trichomes on a leaf. A truly regular trichome pattern shows a single ND distribution peak  
105 since the shape formed by connecting the positions of three trichomes is an equilateral  
106 triangle. On the other hand, the distribution of NDs broadens as the trichome pattern  
107 becomes more irregular. We calculated the variance in the distribution of NDs and carried  
108 out a quantitative comparison between leaves based on the normalized ND (NND) value,  
109 calculated by dividing ND with the average distance between trichomes on a leaf (Fig 2).

110 We applied the NND quantification method to computational simulations before  
111 performing experiments using real leaves. In the previous RD model [13], differential  
112 equations were solved using fixed parameters, followed by application of a 1% variation to  
113 all cells. However, this calculation did not apply a specific variation to each parameter of a  
114 single gene, which is unlikely to reasonably reflect a biological system. Therefore, we  
115 separately applied a variation to each parameter. That is, we applied two different variations:  
116 equal variations to all cells as in the previous model [13] and specific variations applied  
117 separately to individual parameters. In the previous model, there were 14 dimensionless  
118 parameters. To facilitate interpretation, we used parameters before the dimensionless  
119 treatment (Table 1). We anticipated that our modified mathematical model would distinguish  
120 gene-specific variation from natural stochastic variation. We applied a maximum variation of  
121 50% of the values of parameters to our modified model. To evaluate whether 0–50%  
122 variation was a suitable range, we analyzed publicly available single-cell RNA sequencing  
123 data [20]. The coefficient of variation (CV) of gene expression between 13 single cells was

124 1.12 (red line in Fig. S1). In our simulations, a range of CVs by applying 0–50% variations  
125 was between 0.05 and 0.2, which was far below 1.12. Although Fig S1 shows CVs of only  
126 GL3, all CVs from other components were less than 1.12. These data indicate that the  
127 applied range is biologically relevant. We also found that the number of trichomes and the  
128 regularity of their patterns were not correlated (Fig. S2).

129 In this study, the F test was used to assess the statistical significance of differences  
130 in variance as compared with no particular variation in each parameter. After 500 trials, our  
131 simulations showed that both the regularity of trichome patterns and the number of  
132 trichomes were affected in some parameters (Fig. S3). Since we focused on the parameters  
133 that influenced only the regularity of the trichome distribution pattern, we considered the  
134 parameters that affected only variances and not the number of trichomes, and ignored other  
135 parameters that affected variances of NND distributions. There are three types of  
136 parameters in the model;  $\sigma$ , which represents the rate of gene expression;  $\rho$ , which  
137 represents the rate of degradation; and  $\beta$ , which represents the rate of protein-protein  
138 association. Consequently,  $\sigma_2$  was the only parameter that increased the variance of NNDs  
139 as the variation of the parameters increased, suggesting that a change in  $\sigma_2$  (rate of GL3  
140 expression) affects the regularity of the trichome distribution pattern (Fig. 3). It is worth  
141 noting that  $\sigma_1$  (rate of GL1 expression) did not affect this pattern (Fig. 3), even though GL1 is  
142 a key component of the active GL1-GL3 complex that controls downstream genes  
143 modulating trichome cell fate determination [14,16]. These results suggest that the regularity  
144 of the trichome distribution pattern reflects variations in GL3 expression according to the  
145 mathematical model.

146

147 *2.2 The trichome distribution pattern is independent on the formation of other epidermal cell*  
148 *patterns*

149 To validate our mathematical model, we analyzed trichome patterns on the third and  
150 fourth mature leaves collected from 3-week-old *A. thaliana* plants. NNDs were quantified  
151 using a method described previously [21]. Briefly, each sampled leaf was cleared by

152 incubating in 80% lactic acid. Since a trichome cell walls exhibit polarizing (birefringent)  
153 properties, we used polarized light microscopy (PLM) to distinguish trichomes from non-  
154 trichome epidermal cells, followed by automated analysis to determine the trichome  
155 distribution patterns of all sampled leaves.

156         Since trichomes develop from an epidermal cell, their distribution pattern is  
157 associated with the pattern of non-trichome cells such as pavement cells and stomata cells  
158 on a leaf. The distribution of stomata is more deterministic than that of trichomes and is  
159 unlikely to follow Turing's RD model [22]. It was previously reported that the Voronoi diagram  
160 based on stomata position is correlated with the shape of a pavement cell, which is  
161 accounted for by mechanochemical polarization of contiguous pavement cell walls [23,24];  
162 we therefore assumed that the stomata pattern reflects the pattern of pavement cell shapes  
163 and that patterns of trichomes and other epidermal cells can be distinguished by  
164 simultaneously measuring those of trichome and stomata positions.

165         To demonstrate that the stomata pattern is independent of the trichome distribution  
166 pattern, we analyzed the pattern of pavement cells by fluorescence microscopy following  
167 propidium iodide (PI) staining. We also examined epidermal cell patterns in the *repressor of*  
168 *lrx 1(rol1)* mutant [25], in which cell wall composition is perturbed, resulting in rounder  
169 pavement cells compared with the wild type. We measured both trichome and stomata  
170 patterns of leaves harboring two alleles of the *rol1* mutant (*rol1-1* and *rol1-2*). No correlation  
171 was observed between the NND variances of stomata and trichomes (Fig. 4). The variances  
172 of stomata NNDs were reduced in *rol1* mutants, along with a corresponding reduction of in  
173 the variability of pavement cell patterns; however, no difference between the wild type of  
174 *rol1-1* mutant was observed in trichome patterns. These results suggest that trichome and  
175 pavement cell patterns are established independently of each other.

176

### 177 *2.3 Gene expression variations between cells increase at elevated temperatures*

178         Given that environmental stimuli such as light and temperature, can alter gene  
179 expression [26], we investigated whether modest changes in light intensity or temperature

180 would affect gene expression variations. Exposure of seedlings to a relatively strong light  
181 intensity perturbed both trichome and stomata distribution patterns (Fig. S4). However,  
182 seedlings exposed to a modestly high temperature (26°C) showed perturbed trichome  
183 distribution patterns but normal stomata distribution patterns compared with seedlings grown  
184 in plates at 22°C (Fig. 5), suggesting that gene expression was more varied at 26°C. A  
185 further increase in temperature to 30°C eventually disturbed stomata distribution patterns.  
186 These results suggest that the trichome distribution pattern is more sensitive to  
187 environmental fluctuations than the stomata distribution pattern.

188 The results obtained from sampled leaves are likely to reflect the amounts of *GL3*  
189 gene products. To confirm that the variation of the *GL3* protein amounts correspond to the  
190 *NND* distribution pattern, we evaluated the *GL3* protein level in transgenic plants expressing  
191 the *GL3* gene fused to *yellow fluorescent protein (YFP)* gene under the control of the *GL3*  
192 promoter (*GL3-YFP*) [14,27]. Since we considered the trichome pattern but not mature  
193 trichomes per se, we measured YFP signals in the cells within the trichome initiation zone  
194 [28]. Variability in the intensity of *GL3-YFP* fluorescence in *Arabidopsis* leaves increased at  
195 26°C (Fig. 6). The distribution of *GL3-YFP* fluorescence showed no significant difference  
196 between plants grown under strong light condition, in which patterns of trichome as well as  
197 pavement cells were altered, and those grown under normal light intensity, as expected.  
198 These results indicate that the trichome pattern reflects the variation in *GL3* expression,  
199 unless the stomata pattern change, and is increased at modestly high temperatures.

200

#### 201 *2.4 Trichome distribution patterns are variable in accessions and climate*

202 Based on the above findings, we speculated that variations in gene expression under  
203 certain conditions could be predicted based on the regularity of the trichome pattern, and  
204 this could have an adaptive significance. We were also curious to determine which natural  
205 factors are responsible for the gene expression variation. We addressed these questions by  
206 comparing the regularity of trichome distribution patterns between of *A. thaliana* accessions  
207 adapted to the different climatic conditions [29-31]. A total of 11 accessions (Don-0, Aitba-1,



208 Col-0, IP-Tri-0, Yo-0, Ra-0, Van-0, Ler-0, Spro-0, Pi-0, and Kin-0) were grown together in  
209 one plate under a normal or modestly high temperature (Fig. 7). Strikingly, the results  
210 indicated that the change in NDD variance varied between accessions. The accessions  
211 could be divided into two groups at 26°C: the high-variance group, comprising Don-0, Aitba-  
212 1, and Col; and the low-variance group, comprising Ler and other accessions. IP-Tri-0 was  
213 the only accession that showed no difference in NND variance distribution between at 22°C  
214 and 26°C. This led us to another question, i.e., whether gene expression variations would  
215 reflect the specific environment to which an accession is adapted.

216 To evaluate the relationship between gene expression variation and environmental  
217 factors, we used the BioClim data set, which comprises 19 global land surface datasets  
218 (Table 2; Worldclim [<http://www.worldclim.org/current>]) [32]. Since Col and Ler have been  
219 grown under experimental conditions for more than 70 years, we excluded Col and Ler in  
220 this analysis. We calculated the ratio of variance at 26°C to that at 22°C. When gene  
221 expression variation increased under mild heat, the ratio of variances increased beyond 1.0.  
222 We analyzed the ratio of variances of 11 accessions and compared these ratios with BioClim  
223 indices (Fig. S5). We found that three indices (BIO1, BIO10, and BIO11) showed significant  
224 positive correlations with the ratio of variances of NND. Interestingly, all of these three  
225 indices represent mean temperature under certain conditions. In particular, BIO1, the index  
226 of the mean of annual temperature, was positively correlated with the variability in the  
227 trichome distribution patterns (Fig. 8). These results demonstrate a strong relationship  
228 between gene expression variation and environmental factors, especially temperature,  
229 suggesting that temperature affects gene expression variations.

230

### 231 *2.5. Trichome distribution patterns are altered by histone-modifying agents*

232 It has been reported that the epigenetic status of a gene determines its expression  
233 level [33]. We therefore quantified trichome patterns by analyzing gene expression variations  
234 in leaves of plants treated with sodium butyrate (SB) or trichostatin A (TSA), both of which  
235 inhibit histone acetyltransferase activity in plants [34]. Since histone modifications are

236 related to various biological processes, their perturbation can have pleiotropic effects.  
237 Accordingly, treatment with 5 mM SB, a standard concentration used in experiments,  
238 reduced overall plant size (Fig. S6). However, low concentrations of SB and TSA perturbed  
239 trichome but not stomata patterns (Fig. 9), indicating that modest perturbation of histone  
240 modifications has non-uniform effects on gene expression variations, which in turn increase  
241 the variability of the trichome distribution patterns.

242

## 243 *2.6. Variations in the trichome distribution patterns and H2A.Z*

244 Since epigenetic modifications drastically alter nucleosome positions, we surveyed  
245 the nucleosome positions in the GL3 genic region using publicly available data  
246 (<http://epigenomics.mcdb.ucla.edu/Nuc-Seq>), which suggested that the promoter region of  
247 GL3 was relatively open (Fig S7A). To determine whether the chromatin was altered in the  
248 GL3 genic region, we performed the micrococcal nuclease (MNase) assay. No differences  
249 were observed in nucleosome positions at 22°C and 26°C (Fig. S7B). Considering our  
250 findings that the gene expression of GL3 is influenced by temperature [26], we focused on  
251 H2A.Z, which is a key histone variant involved in the thermosensing process in *Arabidopsis*.  
252 To determine whether the trichome distribution pattern is altered in the absence of a  
253 functional H2A.Z, we observed the variability in trichome distribution pattern in *arp6-1*  
254 mutant, in which eviction of H2A.Z nucleosome was perturbed [35,36]. Strikingly, Figure 10  
255 shows that the variability in the trichome distribution pattern of the *arp6-1* mutant grown at  
256 26°C was significantly lower than that in its background accession (Col). Moreover, the  
257 variability in the trichome distribution pattern of *arp6-1* was higher at 22°C than at 26°C.

258

## 259 **3. Discussion**

260 In this study, we present three major findings. First, based on the leaf trichome  
261 distribution patterns, we developed a model for measuring variations in the expression of a  
262 single gene without directly quantifying the gene expression level (e.g. by single-cell next  
263 generation sequencing). Second, the degree of gene expression variations is correlated with

264 the annual mean temperature of the region to which the plants were adapted. Third, the  
265 H2A.Z is involved in the gene expression variation affected by mild temperature elevation.

266 Both GL1 and GL3 are involved in the initiation of trichome formation [14-16];  
267 however, variations in the expression of only GL3, but not GL1, enhanced the variance of  
268 the trichome distribution pattern in our mathematical model (Fig. 3). Although it remains  
269 unclear why the variation in GL3 expression affects the trichome distribution pattern, the  
270 association of GL3 with a single MYB transcription factor (R3-MYB) may influence the  
271 variations in downstream events. Our results suggest that two parameters,  $\beta_2$  and  $\gamma_1$ ,  
272 decreased trichome numbers and increased the variability in the trichome distribution  
273 pattern, whereas  $\sigma_2$  affected only the trichome distribution pattern. Interestingly, the  
274 parameters of the other trichome factor, GL1 ( $\sigma_1$ ), and the association of GL3 with GL1 ( $\beta_2$ ),  
275 were not factors that affected the trichome distribution pattern only (Fig. S3). Our simulation  
276 also suggested that trichome numbers and patterns were independent of each other (Fig.  
277 S2). Indeed, real leaves showed no or weak correlation between trichome numbers and  
278 trichome distribution patterns (Fig. 5). Further studies are needed to investigate variations in  
279 those parameters could affect trichome numbers.

280 We found that changes in the trichome distribution pattern under mild heat varied  
281 between accessions; the variability in the trichome distribution pattern increased in some  
282 accessions and decreased in others under a modestly high temperature. This difference  
283 between accessions is likely attributable to the environment to which each accession is  
284 adapted. Climate is a key factor in adaptation. Trichome is thought to offer protection against  
285 herbivores, drought, and ultraviolet (UV) radiation; however, this study is the first to report  
286 that the trichome distribution pattern of a plant may contribute to its environmental fitness.  
287 Consistent with our findings of no correlation between trichome number and distribution  
288 pattern in *A. thaliana*, it has been suggested that trichomes in *A. lyrata*, are unlikely to be  
289 correlated with latitudes [37]. We speculate that to adapt, plants must be able to sense and  
290 respond to minute but significant changes in the environment. Mutations in the genome  
291 sequence are costly if the environmental change is transient; therefore, plants would have a

292 system to quickly respond to such changes by increasing or suppressing variations in gene  
293 expression. We do not have any evidence that the trichome distribution pattern actively  
294 drives environmental adaptation in plants. The trichome pattern could be just a consequence  
295 of this response, although we cannot exclude the possibility that the trichome distribution  
296 pattern could actively contribute to plant growth in response to modest alterations in  
297 temperatures. Moreover, it is unclear whether the temperature caused genetic mutation for  
298 adaptation or a natural variation existing in each accession increased the fitness. Despite  
299 that Ler is derived from Col [38], Col and Ler showed opposite tendency with regard to the  
300 variability in trichome distribution patterns, suggesting that, at least, genetic mutations  
301 contribute the gene expression variation.

302 Plants employ a system comprising H2A.Z in order to sense and respond to  
303 temperature by modifying the nucleosome structure [36]. H2A.Z is a variant of histone H2A  
304 and functions to repress gene expression [39]. Ambient heat stress induces eviction of  
305 H2A.Z from the nucleosome to change gene expression. To load H2A.Z into the nucleosome  
306 requires ARP6, a subunit of the SWR1 complex. Compared with Col, *arp6-1* mutant shows  
307 increased variability of trichome distribution pattern at 22°C but similar variance at 26°C.  
308 These results suggest the involvement of H2A.Z in gene expression variation.

309 Variability in the trichome distribution pattern was increased by alterations in histone  
310 modifications and was correlated with the mean annual temperature. We could not generate  
311 evidence supporting altered nucleosome occupancy around the *GL3* genic region (Fig. S6),  
312 possibly because of limited technical sensitivity. Other experiments, such as chromatin  
313 immunoprecipitation (ChIP) after cell sorting of trichome initial cells, may help us to reveal  
314 the cell-type specific nucleosome structure; however, it remains technically challenging.  
315 Variations in the expression of *GL3* may be more susceptible to modest environmental  
316 fluctuations than genes related to leaf development, such as those involved in pavement cell  
317 formation, and variations in gene expression could occur through epigenetic modifications  
318 including H2A.Z occupancy.

319 Gene expression variations are mainly classified into two categories based on the  
320 source of causal factors: intrinsic variation, which is observed intrinsically due to  
321 thermodynamics fluctuations, resulting in variable gene expression changes between cells;  
322 and extrinsic variation, which is caused by extrinsic factors, such as environmental stimuli,  
323 and is therefore observed in all cells simultaneously. In our experiments, we could not  
324 determine whether intrinsic or extrinsic variation caused the variability in the trichome  
325 distribution pattern. Variation in the nucleosome structures due to epigenetic modifications is  
326 supposedly a major contributor to intrinsic variation [2]. Our results of the chemical  
327 perturbation of histone modification revealed changes in trichome distribution patterns,  
328 which could be an evidence of intrinsic variation in the case of trichome pattern. On the other  
329 hand, altered trichome distribution patterns due to a modest heat treatment may be an  
330 example of extrinsic variation. Therefore, our approach consists of both intrinsic and  
331 extrinsic variations.

332 In conclusion, our finding of a correlation between the trichome distribution pattern  
333 and temperature suggests that natural variation in gene expression is associated with  
334 adaptation to the environment. Further investigation would help to understand the biological  
335 relevance of the trichome distribution pattern, as well as the mechanism underlying gene  
336 expression variation to achieve environmental adaptation.

337

## 338 **4. Materials and Methods**

### 339 *4.1. Plant materials and growth conditions*

340 *Arabidopsis thaliana* accessions Aitba-1, Col-0, Ler-0, Don-0, IP-Tri-0, Kin-0, Pi-0 Ra-0,  
341 Spro-0, Van-0, and Yo-0, obtained from the Arabidopsis Biological Resource Center (ABRC;  
342 Ohio State University, Columbus, OH, USA), were used in this study. We show data for Col and  
343 Ler, which originated from Col-0 and Ler-0, respectively. Seeds of *rol1-1* and *rol1-2* mutants  
344 were obtained from ABRC. Seeds of the *ap6-1* mutant were kindly provided by P. Wigge (John  
345 Innes Centre, UK) and K. Sugimoto (RIKEN, Japan).

346 Seeds were sterilized for 6 min in a solution of 50% commercial bleach (Kao, Singapore)  
347 containing 6% sodium hypochlorite and then were washed three times with distilled water. The  
348 sterilized seeds were laid out on a sterile filter paper or in 50% Murashige and Skoog (MS)  
349 medium (Wako Pure Chemical Industries, Osaka, Japan) supplemented with 1% sucrose (Wako  
350 Pure Chemical Industries) and 6% gellan gum (pH 5.9; Wako Pure Chemical Industries), and  
351 sterilized 0.1% agarose solution was added to the seeds. Plates containing the seeds were  
352 incubated at 4°C in the dark for 3 days. Subsequently, the plates were transferred to a growth  
353 chamber and incubated for 21 days at 22°C under constant light (1,000 lm/m<sup>2</sup>).

354 To conduct environmental stress treatments, plants were grown for 21 days at 22°C, 26°C,  
355 or 30°C under constant light (1,000 lm/m<sup>2</sup>). To perform heat stress treatments, plates were  
356 incubated at 26°C or 30°C under constant light (1,000 lm/m<sup>2</sup>). To perform strong light stress  
357 treatments, plants were incubated at 22°C under constant light (1,000 lm/m<sup>2</sup>) and strong light  
358 (3,000 lm/m<sup>2</sup>) after vernalization. To conduct the histone deacetylase inhibitor treatment, the  
359 filter paper on which plants were grown was transferred to a solution of trichostatin A (T8552;  
360 Sigma-Aldrich, St. Louis, MO, USA) or sodium butyrate (B5887; Sigma-Aldrich) at various  
361 concentrations followed by soaking on 50% MS medium for 1 h. The filter paper was then  
362 transferred to the original MS medium plate and cultured under the original conditions for 14  
363 days.

364

#### 365 *4.2. CV of gene expression variations*

366 Publicly available single-cell RNA sequencing data were used [20]. Since the available  
367 data consist of FPKM values that classified into cell types, coefficient variance (CV) of FPKM  
368 of each gene within a cell type was calculated. Since a low expression tends high variation,  
369 the FPKM values higher than average were used. After calculation of CV of each gene, a  
370 mean CV was calculated from whole CVs.

371

#### 372 4.3. Quantification of the trichome distribution pattern

373 *Arabidopsis* leaves were examined by PLM as previously described [21], with minor  
374 modifications. After 21 days of growth, the third or fourth leaves were harvested, cleared, and  
375 incubated overnight in 95% ethanol and then for 1 h in 80% lactic acid. Images of cleared leaves  
376 were acquired by PLM, and the positions of trichomes were automatically marked using the  
377 ImageJ software (National Institutes of Health, Bethesda, MD, USA) with a custom script.  
378 Distances between trichomes were calculated using the R software (31), and NNDs were  
379 calculated according to the following equation:

380

$$381 \quad NND = \frac{SD \times N}{\sum_{i=1}^N SD_i} \quad (1)$$

382 where  $SD_i$  is the  $i^{th}$  shortest path between two trichomes, and  $N$  is the number of trichomes. The  
383 variance of NND was calculated, and the F test was used to validate the significance of  
384 differences between variance values. At least 125 trichomes derived from five or more plants  
385 were examined. To analyze the stomata pattern, leaves were stained with PI and observed by  
386 fluorescence microscopy. The NNDs of stomata were calculated using the equation (1) but with  
387 stomata positions, not trichome positions. At least 306 stomata derived from five or more plants  
388 were analyzed.

#### 389 4.4. Estimation of the range of biologically appropriate stochastic variations

390 To determine the range of biologically appropriate variations, the stochastic parameters,  $K_v$ ,  
391 were calculated using the following equation:

$$392 \quad K_v = K_f + k \quad (2)$$

$$393 \quad k \sim N(0, K_f + r) \quad (3)$$

394 where  $K_f$  is a fixed value from Table 1, and  $r$  ranges from 0% to 50% of the value of  $K_f$ . The  
395 symbol  $K_v$  was assigned to all parameters, as long as trichome patterns appeared in the  
396 simulation.

397 **4.5. Mathematical modeling and simulations**

398 All simulations in this study were performed using Matlab (9.0.0.341360 [R2016a];  
 399 MathWorks, Natick, MA, USA). The mathematical model and scripts were based on a previous  
 400 study [13], with some modifications. Based on the interaction diagram shown in Figure 1A, the  
 401 following equations were used:

402  
 403 
$$\frac{\partial}{\partial t}[GL1]_j = \sigma_1 + \alpha_1[AC]_j - [GL1]_j(\rho_1 + \beta_1[GL3]_j) \quad (4)$$

404 
$$\frac{\partial}{\partial t}[GL3]_j = \sigma_2 + \alpha_2[AC]_j - [GL3]_j(\rho_2 + \beta_1[GL1]_j + \beta_2[R3MYB]_j) \quad (5)$$

405 
$$\frac{\partial}{\partial t}[R3MYB]_j = \sigma_3 + \alpha_3[AC]_j^2 - [R3MYB]_j(\rho_3 + \beta_1[GL1]_j + \beta_2[GL3]_j + \beta_2[AC]_j) +$$
  
 406 
$$\gamma_1\langle[R3MYB]_j\rangle \quad (6)$$

407 
$$\frac{\partial}{\partial t}[AC]_j = \beta_1[GL1]_j[GL3]_j - \rho_4[AC]_j$$
  
 408 (7)

409  
 410 The values of parameters used are shown in Table 1. The steady state was determined  
 411 with an additional 1% stochastic variation in parameters per cell as the initial condition for the  
 412 simulation of cell grids. Simulations were performed 500 times using 10,000 grids, unless  
 413 specified otherwise.

414 **Table 1.** Parameters used in this study.

| Parameter  | Function                            | Value   |
|------------|-------------------------------------|---------|
| $\sigma_1$ | Basal GL1 transcription rate        | 8.2707  |
| $\alpha_1$ | AC-regulated GL1 transcription rate | 3.4869  |
| $\rho_1$   | GL1 degradation rate                | 1       |
| $\beta_1$  | GL1-GL3 interaction rate            | 1       |
| $\sigma_2$ | Basal GL3 transcription rate        | 15.0952 |
| $\alpha_2$ | AC-regulated GL3 transcription rate | 1.3488  |



|            |                                       |        |
|------------|---------------------------------------|--------|
| $\rho_2$   | GL3 degradation rate                  | 0.4503 |
| $\beta_2$  | GL3-R3MYB interaction rate            | 7.9509 |
| $\alpha_3$ | AC-regulated R3MYB transcription rate | 0.4117 |
| $\rho_3$   | R3MYB degradation rate                | 0.9565 |
| $\gamma_1$ | R3MYB transport rate                  | 9.565  |
| $\rho_4$   | AC degradation rate                   | 0.2703 |

---

415

416 *4.6. Comparison of climate data*

417 To compare the regularity of trichome distribution patterns with respect to climate data, 19  
 418 BioClim indices (BIO1–19) [32] were used (Table 2). To obtain correlation coefficients between  
 419 these indices and determine the regularity of the trichome distribution pattern, the ratio of  
 420 variances between plants grown at 22°C and 26°C were calculated, yielding a dimensionless  
 421 value, which was plotted against each BioClim index. Then, the Pearson’s correlation coefficient  
 422 was calculated.

423

**Table 2.** BioClim indices.

| BioClim Index | Description                                                |
|---------------|------------------------------------------------------------|
| BIO1          | Annual Mean Temperature                                    |
| BIO2          | Mean Diurnal Range (Mean of monthly (max temp - min temp)) |
| BIO3          | Isothermality (BIO2/BIO7) (* 100)                          |
| BIO4          | Temperature Seasonality (standard deviation *100)          |
| BIO5          | Max Temperature of Warmest Month                           |
| BIO6          | Min Temperature of Coldest Month                           |
| BIO7          | Temperature Annual Range (BIO5-BIO6)                       |
| BIO8          | Mean Temperature of Wettest Quarter                        |
| BIO9          | Mean Temperature of Driest Quarter                         |

|       |                                                      |
|-------|------------------------------------------------------|
| BIO10 | Mean Temperature of Warmest Quarter                  |
| BIO11 | Mean Temperature of Coldest Quarter                  |
| BIO12 | Annual Precipitation                                 |
| BIO13 | Precipitation of Wettest Month                       |
| BIO14 | Precipitation of Driest Month                        |
| BIO15 | Precipitation Seasonality (Coefficient of Variation) |
| BIO16 | Precipitation of Wettest Quarter                     |
| BIO17 | Precipitation of Driest Quarter                      |
| BIO18 | Precipitation of Warmest Quarter                     |
| BIO19 | Precipitation of Coldest Quarter                     |

424

#### 425 4.7. MNase assay

426 The micrococcal nuclease (MNase) assay was performed according to [40]. 0.5 g of 3-  
427 weeks seedlings were collected, frozen with liquid nitrogen, and crushed in a tube with beads  
428 and a crusher. 10 ml nuclear extraction buffer A (0.25 M sucrose, 60 mM KCl, 15 mM MgCl<sub>2</sub>, 1  
429 mM CaCl<sub>2</sub>, 15 mM PIPES (pH 6.8), 0.8% Triton X-100, and 1 mM phenylmethylsulfonyl fluoride  
430 (PMSF)) was added to the crushed tissue in a 50 ml Falcon tube. The crushed tissue sample  
431 was mixed with a vortex and filtered through a funnel with a single layer of Miracloth  
432 (MilliporeSigma, Burlington, Massachusetts). The sample was filtered twice in total. After  
433 centrifugation at 10,000 g for 20 minutes at 4°C, the supernatant was removed, and 500 µl of  
434 nuclear extraction buffer B (0.25 M sucrose, 10 mM Tris-HCl (pH 8.0), 10 mM MgCl<sub>2</sub>, 1% Triton  
435 X-100, 5 mM 2-mercaptoethanol, and 1 mM PMSF) was added and resuspended. An equal  
436 amount of nuclear extraction buffer C (1.7 M sucrose, 10 mM Tris-HCl (pH 8.0), 10 mM MgCl<sub>2</sub>,  
437 0.5% Triton X-100, 5 mM 2-mercaptoethanol, and 1 mM PMSF) was prepared in a new 1.5 ml  
438 tube and the resuspended sample was gently added. After centrifugation at 12,000 g for 1 hour  
439 at 4°C, all the supernatant was removed and resuspended in 250 µl MNase buffer (0.3 M  
440 sucrose, 20 mM Tris-HCl (pH 7.5), and 3 mM CaCl<sub>2</sub>). The DNA concentration at this time was

441 measured. After adjusting the DNA concentration with MNase buffer within 300-600 ng/ $\mu$ l, 10  $\mu$ l  
442 MNase (2,000,000 gels units/ml, NEB, Ipswich, Massachusetts) with appropriate units was  
443 added to 30  $\mu$ l sample and incubated at 37°C for 15 minutes. After incubation, 40  $\mu$ l of 2x stop  
444 buffer (50 mM EDTA and 1% SDS), 10x proteinase K buffer (100 mM Tris-HCl (pH 7.8), 50 mM  
445 EDTA, and 5% SDS) and 1  $\mu$ l of proteinase K (800 units/ml) were added and incubated at 45°C  
446 for 1 hour. The DNA was purified by the phenol/chloroform extraction, followed by the ethanol  
447 precipitation. After the fragmented DNA concentration were confirmed by agarose gel  
448 electrophoresis, real-time PCR was performed. *At4g07700*, a gypsy-like transposable element,  
449 was used as a reference in real-time PCR [41]. The oligo primers used are shown in Table 3.

450 **Table 3.** Oligo primers used for MNase assay.

|                        |                        |
|------------------------|------------------------|
| SO_MNase_At4g07700_Fwd | ACTGGTTGCTAGCTGGGAGA   |
| SO_MNase_At4g07700_Rev | CCAGTGTTGGTTCTCCTTGG   |
| SO_MNase_GL3_1_Fwd     | AAAAGTTCAGCCTTGACGTG   |
| SO_MNase_GL3_1_Rev     | CCATTGTTGTGGTCTTGTCTTC |
| SO_MNase_GL3_2_Fwd     | TCGAGTTCAAGCTCAAACAAC  |
| SO_MNase_GL3_2_Rev     | TTTCGCCGGAACAAACAG     |
| SO_MNase_GL3_3_Fwd     | ATGGCTACCGGACAAAACAG   |
| SO_MNase_GL3_3_Rev     | TTACCCAGACTGAGAAGCAGAG |

451

452

### 453 **Supplementary Materials**

454 **Figure S1:** Coefficient of variation (CV) of gene expression variations; **Figure S2:**  
455 Relationship between the number of trichomes and regularity of the trichome distribution  
456 pattern; **Figure S3:** Variances of the normalized next-neighbor distance (NND) and number  
457 of trichomes in mathematical simulations; **Figure S4:** NND variances of the trichomes and  
458 stomata of *Arabidopsis* plants grown under different light intensities; **Figure S5:** Correlation

459 between gene expression variation and BioClim indices; **Figure S6:** Size of seedlings grown  
460 in the presence of various concentrations of sodium butyrate, a histone deacetylase inhibitor;  
461 **Figure S7:** Micrococcal nuclease (MNase) assay.

462

#### 463 **Author Contributions**

464 Conceptualization, S.O. and K.M.; methodology, S.O., T.U. and K.M.; validation, S.O., K.N.  
465 and T.Y.; formal analysis, S.O., K.N., and Y.T.; investigation, S.O. and Y.T; data curation, S.O.  
466 T.U. and K.M.; writing—original draft preparation, K.M.; writing—review and editing, T.U. and  
467 K.M.; supervision, K.M.; project administration, K.M.; funding acquisition, K.M. All authors  
468 have read and agreed to the published version of the manuscript.

469

#### 470 **Funding**

471 This research was funded by the JSPS Grant-in-Aid for Scientific Research (C) JP16K07723  
472 and Grant-in-Aid for Scientific Research on Innovative Areas JP18H04631.

473

#### 474 **Acknowledgments**

475 We thank P. Wigge (John Innes Centre, UK) and K. Sugimoto (RIKEN, Japan) for sharing  
476 *arp6-1* mutant seeds. We also thank V. Teva for critically reading the manuscript and providing  
477 useful suggestions, and H. Takemura for helpful discussions and suggestions regarding the  
478 simulation scripts. We thank N. Takayanagi for providing invaluable assistance in conducting  
479 the experiments.

480

481 **Conflicts of Interest:** The authors declare no conflicts of interest.

482

#### 483 **References**

484

485 1. Elowitz, M. B.; Levine, A. J.; Siggia, E. D.; Swain, P. S. Stochastic gene expression in a  
486 single cell. *Science* **2002**, 297, 1183–1186.

487 2. Chalancon, G.; Ravarani, C. N. J.; Balaji, S.; Martinez-Arias, A.; Aravind, L.; Babu, M. M.  
488 Interplay between gene expression noise and regulatory network architecture. *Trends*  
489 *Genet* **2012**, 28, 221–232.

490 3. Eldar, A.; Elowitz, M. B. Functional roles for noise in genetic circuits. *Nature* **2010**, 467,  
491 167–173.

492 4. Shalek, A. K.; Satija, R.; Adiconis, X.; Gertner, R. S.; Gaublomme, J. T.; Raychowdhury,  
493 R.; Schwartz, S.; Yosef, N.; Malboeuf, C.; Lu, D.; Trombetta, J. J.; Gennert, D.; Gnirke,  
494 A.; Goren, A.; Hacohen, N.; Levin, J. Z.; Park, H.; Regev, A. Single-cell transcriptomics  
495 reveals bimodality in expression and splicing in immune cells. *Nature* **2013**, 498, 236–  
496 240.

497 5. Guo, G.; Pinello, L.; Han, X.; Lai, S.; Shen, L.; Lin, T.-W.; Zou, K.; Yuan, G.-C.; Orkin, S.  
498 H. Serum-Based Culture Conditions Provoke Gene Expression Variability in Mouse  
499 Embryonic Stem Cells as Revealed by Single-Cell Analysis. *CELREP* **2016**, 14, 956–965.

500 6. Meyer, H. M.; Teles, J.; Formosa-Jordan, P.; Refahi, Y.; San-Bento, R.; Ingram, G.;  
501 Jönsson, H.; Locke, J. C. W.; Roeder, A. H. K. Fluctuations of the transcription factor  
502 ATML1 generate the pattern of giant cells in the *Arabidopsis* sepals. *eLife* **2017**, 6, e19131.

503 7. Besnard, F.; Refahi, Y.; Morin, V.; Marteaux, B.; Brunoud, G.; Chambrier, P.; Rozier, F.;  
504 Mirabet, V.; Legrand, J.; Lainé, S.; Thévenon, E.; Farcot, E.; Cellier, C.; Das, P.; Bishopp,  
505 A.; Dumas, R.; Parcy, F.; Helariutta, Y.; Boudaoud, A.; Godin, C.; Traas, J.; Guédon, Y.;  
506 Vernoux, T. Cytokinin signalling inhibitory fields provide robustness to phyllotaxis. *Nature*  
507 **2014**, 505, 417–421.

508 8. Meyer, H. M.; Roeder, A. H. K. Stochasticity in plant cellular growth and patterning.  
509 *Frontiers in plant science* **2014**, 5, 420.

- 510 9. Jimenez-Gomez, J. M.; Corwin, J. A.; Joseph, B.; Maloof, J. N.; Kliebenstein, D. J.  
511 Genomic Analysis of QTLs and Genes Altering Natural Variation in Stochastic Noise.  
512 *PLoS Genet* **2011**, *7*, e1002295–17.
- 513 10. Robinson, D. O.; Roeder, A. H. ScienceDirectThemes and variations in cell type  
514 patterning in the plant epidermis. *Curr Opin Genet Dev* **2015**, *32*, 55–65.
- 515 11. Araújo, I. S.; Pietsch, J. M.; Keizer, E. M.; Greese, B.; Balkunde, R.; Fleck, C.; Hülskamp,  
516 M. Stochastic gene expression in *Arabidopsis thaliana*. *Nat Comms* **2017**, *8*, 2132.
- 517 12. Hülskamp, M. Plant trichomes: a model for cell differentiation. **2004**, *5*, 471–480.
- 518 13. Digiuni, S.; Schellmann, S.; Geier, F.; Greese, B.; Pesch, M.; Wester, K.; Dartan, B.; Mach,  
519 V.; Srinivas, B. P.; Timmer, J.; Fleck, C.; Hülskamp, M. A competitive complex formation  
520 mechanism underlies trichome patterning on *Arabidopsis* leaves. *Mol Syst Biol* **2008**, *4*,  
521 217.
- 522 14. Morohashi, K; Grotewold, E. A systems approach reveals regulatory circuitry for  
523 *Arabidopsis* trichome initiation by the GL3 and GL1 selectors. *PLoS Genet* **2009**, *5*,  
524 e1000396.
- 525 15. Ishida, T.; Kurata, T.; Okada, K.; Wada, T. A genetic regulatory network in the  
526 development of trichomes and root hairs. *Annual review of plant biology* **2008**, *59*, 365–  
527 386.
- 528 16. Pattanaik, S.; Patra, B.; Singh, S. K.; Yuan, L. An overview of the gene regulatory network  
529 controlling trichome development in the model plant, *Arabidopsis*. *Frontiers in plant*  
530 *science* **2014**, *5*, 259.
- 531 17. Kondo, S.; Miura, T. Reaction-diffusion model as a framework for understanding biological  
532 pattern formation. *Science* **2010**, *329*, 1616–1620.
- 533 18. Torii, K. U. Two-dimensional spatial patterning in developmental systems. **2012**, *22*, 438–  
534 446.
- 535 19. Greese, B.; Hülskamp, M.; Fleck, C. Quantification of variability in trichome patterns.  
536 *Frontiers in plant science* **2014**, *5*, 596.

- 537 20. Treutlein, B.; Brownfield, D. G.; Wu, A. R.; Neff, N. F.; Mantalas, G. L.; Espinoza, F. H.;  
538 Desai, T. J.; Krasnow, M. A.; Quake, S. R. Reconstructing lineage hierarchies of the distal  
539 lung epithelium using single-cell RNA-seq. *Nature* **2014**, *509*, 371–375.
- 540 21. Pomeranz, M.; Campbell, J.; Siegal-Gaskins, D.; Engelmeier, J.; Wilson, T.; Fernandez,  
541 V.; Brkljacic, J. High-resolution computational imaging of leaf hair patterning using  
542 polarized light microscopy. *Plant J* **2013**, *73*, 701–708.
- 543 22. Simmons, A. R.; Bergmann, D. C. Transcriptional control of cell fate in the stomatal  
544 lineage. *Curr Opin Plant Biol* **2016**, *29*, 1–8.
- 545 23. Staff, L.; Hurd, P.; Reale, L.; Seoighe, C.; Rockwood, A.; Gehring, C. The hidden  
546 geometries of the *Arabidopsis thaliana* epidermis. *PLoS ONE* **2012**, *7*, e43546.
- 547 24. Majda, M.; Grones, P.; Sintorn, I.-M.; Vain, T.; Milani, P.; Krupinski, P.; Zagórska-Marek,  
548 B.; Viotti, C.; Jönsson, H.; Mellerowicz, E. J.; Hamant, O.; Robert, S. Mechanochemical  
549 Polarization of Contiguous Cell Walls Shapes Plant Pavement Cells. *Dev Cell* **2017**, *43*,  
550 290–304.e4.
- 551 25. Ringli, C.; Bigler, L.; Kuhn, B. M.; Leiber, R.-M.; Diet, A.; Santelia, D.; Frey, B.; Pollmann,  
552 S.; Klein, M. The modified flavonol glycosylation profile in the *Arabidopsis rol1* mutants  
553 results in alterations in plant growth and cell shape formation. *Plant Cell* **2008**, *20*, 1470–  
554 1481.
- 555 26. Kaiserli, E.; Perrella, G.; Davidson, M. L. ScienceDirect Light and temperature shape  
556 nuclear architecture and gene expression. *Curr Opin Plant Biol* **2018**, *45*, 103–111.
- 557 27. Morohashi, K.; Zhao, M.; Yang, M.; Read, B.; Lloyd, A.; Lamb, R. Participation of the  
558 *Arabidopsis* bHLH factor GL3 in trichome initiation regulatory events. *Plant Physiology*  
559 **2007**, *145*, 736–746.
- 560 28. Schnittger, A.; Folkers, U.; Schwab, B.; Jürgens, G.; Hülskamp, M. Generation of a  
561 spacing pattern: the role of triptychon in trichome patterning in *Arabidopsis*. *Plant Cell*  
562 **1999**, *11*, 1105–1116.
- 563 29. Fournier-Level, A.; Korte, A.; Cooper, M. D.; Nordborg, M.; Schmitt, J.; Wilczek, A. M. A  
564 map of local adaptation in *Arabidopsis thaliana*. *Science* **2011**, *334*, 86–89.

- 565 30. Kawakatsu, T.; Huang, S.-S. C.; Jupe, F.; Sasaki, E.; Schmitz, R. J.; Urich, M. A.;  
566 Castanon, R.; Nery, J. R.; Barragan, C.; He, Y.; Chen, H.; Dubin, M.; Lee, C.-R.; O'Neil,  
567 R.; O'Malley, R. C.; Quarless, D. X.; Schork, N. J.; Nordborg, M.; Ecker, J. R.; Alonso-  
568 Blanco, C.; Andrade, J.; Becker, C.; Bemm, F.; Bergelson, J.; Borgwardt, K.; Chae, E.;  
569 Dezwaan, T.; Ding, W.; Exposito-Alonso, M.; Farlow, A.; Fitz, J.; Gan, X.; Grimm, D. G.;  
570 Hancock, A.; Henz, S. R.; Holm, S.; Horton, M.; Jarsulic, M.; Kerstetter, R. A.; Korte, A.;  
571 Korte, P.; Lanz, C.; Lee, C.-R.; Meng, D.; Michael, T. P.; Mott, R.; Mulyati, N. W.; Nägele,  
572 T.; Nagler, M.; Nizhynska, V.; Novikova, P.; Picó, F. X.; Platzer, A.; Rabanal, F. A.;  
573 Rodriguez, A.; Rowan, B. A.; Salomé, P. A.; Schmid, K.; Seren, Ü.; Sperone, F. G.;  
574 Sudkamp, M.; Svoldal, H.; Tanzer, M. M.; Todd, D.; Volchenboum, S. L.; Wang, C.; Wang,  
575 G.; Wang, X.; Weckwerth, W.; Weigel, D.; Zhou, X. Epigenomic Diversity in a Global  
576 Collection of *Arabidopsis thaliana* Accessions. *Cell* **2016**, *166*, 492–505.
- 577 31. Consortium, T. 1. G.; Alonso-Blanco, C.; Andrade, J.; Becker, C.; Bemm, F.; Bergelson,  
578 J.; Borgwardt, K. M.; Cao, J.; Chae, E.; Dezwaan, T. M.; Ding, W.; Ecker, J. R.; Exposito-  
579 Alonso, M.; Farlow, A.; Fitz, J.; Gan, X.; Grimm, D. G.; Hancock, A. M.; Henz, S. R.; Holm,  
580 S.; Horton, M.; Jarsulic, M.; Kerstetter, R. A.; Korte, A.; Korte, P.; Lanz, C.; Lee, C.-R.;  
581 Meng, D.; Michael, T. P.; Mott, R.; Mulyati, N. W.; Nägele, T.; Nagler, M.; Nizhynska, V.;  
582 Nordborg, M.; Novikova, P. Y.; Picó, F. X.; Platzer, A.; Rabanal, F. A.; Rodriguez, A.;  
583 Rowan, B. A.; Salomé, P. A.; Schmid, K. J.; Schmitz, R. J.; Seren, Ü.; Sperone, F. G.;  
584 Sudkamp, M.; Svoldal, H.; Tanzer, M. M.; Todd, D.; Volchenboum, S. L.; Wang, C.; Wang,  
585 G.; Wang, X.; Weckwerth, W.; Weigel, D.; Zhou, X. 1,135 Genomes Reveal the Global  
586 Pattern of Polymorphism in *Arabidopsis thaliana*. *Cell* **2016**, *166*, 481–491.
- 587 32. Hijmans, R. J.; Cameron, S. E.; Parra, J. L.; Jones, P. G.; Jarvis, A. Very high resolution  
588 interpolated climate surfaces for global land areas. *Int. J. Climatol.* **2005**, *25*, 1965–1978.
- 589 33. Dey, S. S.; Foley, J. E.; Limsirichai, P.; Schaffer, D. V.; Arkin, A. P. Orthogonal control of  
590 expression mean and variance by epigenetic features at different genomic loci. *Mol Syst*  
591 *Biol* **2015**, *11*, 806.



- 592 34. Chen, Z. J.; Pikaard, C. S. Epigenetic silencing of RNA polymerase I transcription: a role  
593 for DNA methylation and histone modification in nucleolar dominance. *Genes Dev.* **1997**,  
594 *11*, 2124–2136.
- 595 35. Kumar, S. V.; Wigge, P. A. H2A.Z-Containing Nucleosomes Mediate the Thermosensory  
596 Response in Arabidopsis. *Cell* **2010**, *140*, 136–147.
- 597 36. Quint, M.; Delker, C.; Franklin, K. A.; Wigge, P. A.; Halliday, K. J.; van Zanten, M.  
598 Molecular and genetic control of plant thermomorphogenesis. *Nature Plants* **2016**, *2*, 1–  
599 9.
- 600 37. Kärkkäinen, K.; Løe, G.; Agren, J. Population structure in Arabidopsis lyrata: evidence for  
601 divergent selection on trichome production. *Evolution* **2004**, *58*, 2831–2836.
- 602 38. Rédei, G.P. *Methods in Arabidopsis research*; Koncz, C.; Chua, N.-H.; Schell, J., Ed.;  
603 World Scientific: Singapore, 1992; pp 1 – 15.
- 604 39. Dai, X.; Bai, Y.; Zhao, L.; Dou, X.; Liu, Y.; Wang, L.; Li, Y.; Li, W.; Hui, Y.; Huang, X.;  
605 Wang, Z.; Qin, Y. H2A.Z Represses Gene Expression by Modulating Promoter  
606 Nucleosome Structure and Enhancer Histone Modifications in Arabidopsis. *Molecular*  
607 *Plant* **2017**, *10*, 1274–1292.
- 608 40. Armengot, L.; Moreno-Romero, J. Micrococcal Nuclease (MNase) Assay of *Arabidopsis*  
609 *thaliana* Nuclei. *Bio-protocol* **2013**, *3*, e455.
- 610 41. Franklin, K. A. Plant chromatin feels the heat. *Cell* **2010**, *140*, 26-28.

611

Fig. 1

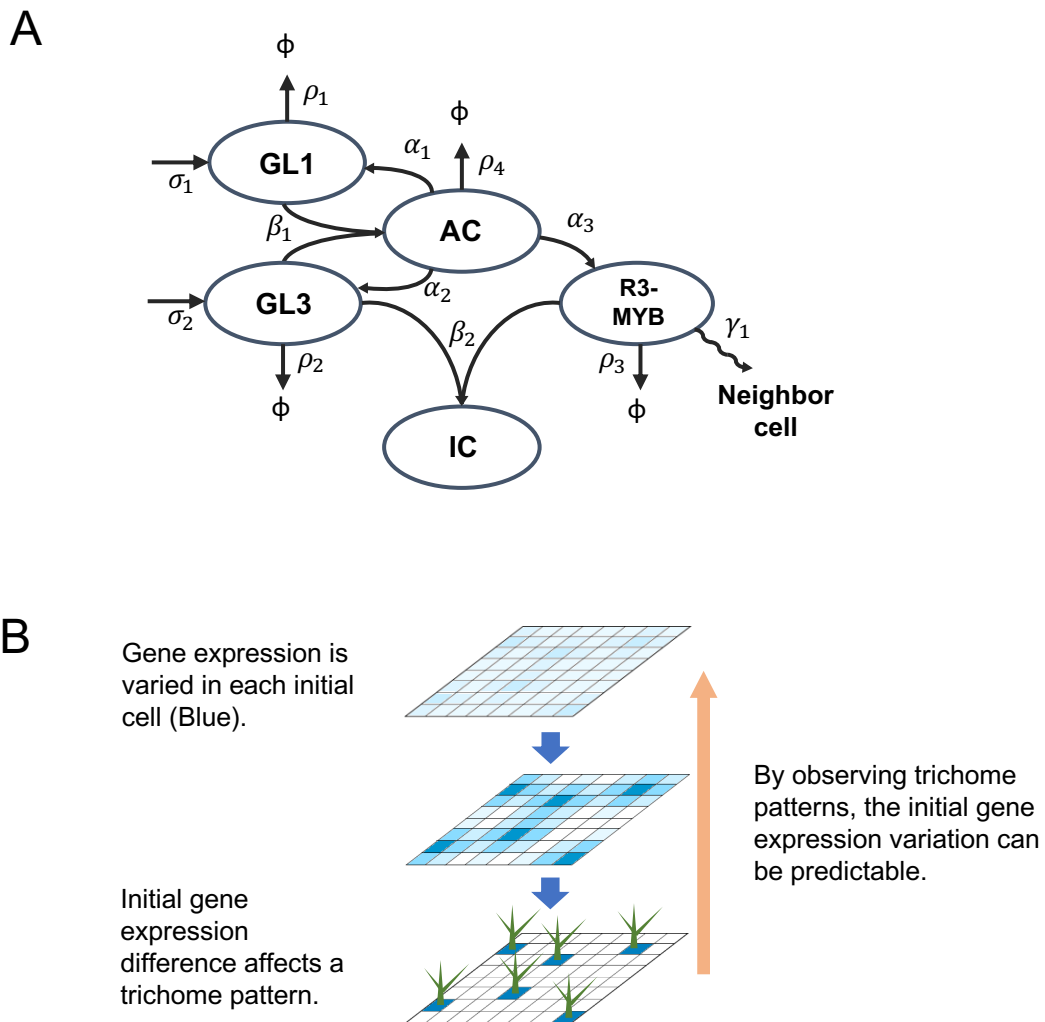

**Figure 1.** Concept of the hypothesis proposed in the text. A) Interaction scheme underlying trichome formation. GL1 and GL3 are expressed at rates of  $\sigma_1$  and  $\sigma_2$ , respectively. GL1 and GL3 form an active complex (AC) at rate  $\beta_1$  to activate GL1, GL3, and R3-MYB at rates  $\alpha_1$ ,  $\alpha_2$ , and  $\alpha_3$ , respectively. GL3 and R3-MYB interact at rate  $\beta_2$  to form an inactive complex (IC). GL1, GL3, AC, and R3-MYB are degraded at rates  $\rho_1$ ,  $\rho_2$ ,  $\rho_4$ , and  $\rho_3$ , respectively. The R3-MYB complex moves to neighboring cells at rate  $\gamma_1$ . B) Schematic representation of the hypothesis proposed in the text. Gene expression variation between cells is represented by the intensity of the blue color (top). Gene expression variations increased (middle), and trichomes eventually formed based on the initial gene expression variations (bottom). According to our hypothesis (orange), gene expression variations in each initial cell can be predicted by measuring trichome distribution patterns.

Fig. 2

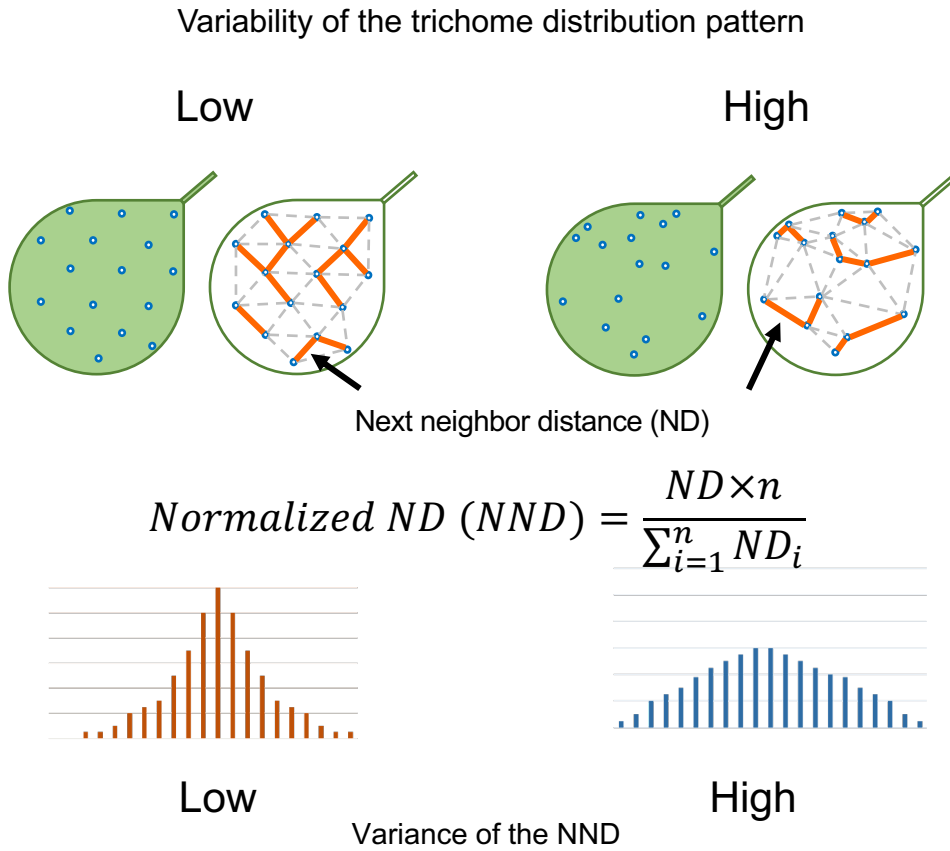

**Figure 2.** Theoretical interpretation of the quantification of the trichome distribution pattern. The orange line indicates the shortest path between trichomes, referred to as next-neighbor distance (ND). The equation used to calculate the normalized ND (NND) is shown in the middle. The histogram of NNDs is shown at the bottom. High variability of the trichome distribution pattern demonstrates high variance of the NND distribution

Fig. 3

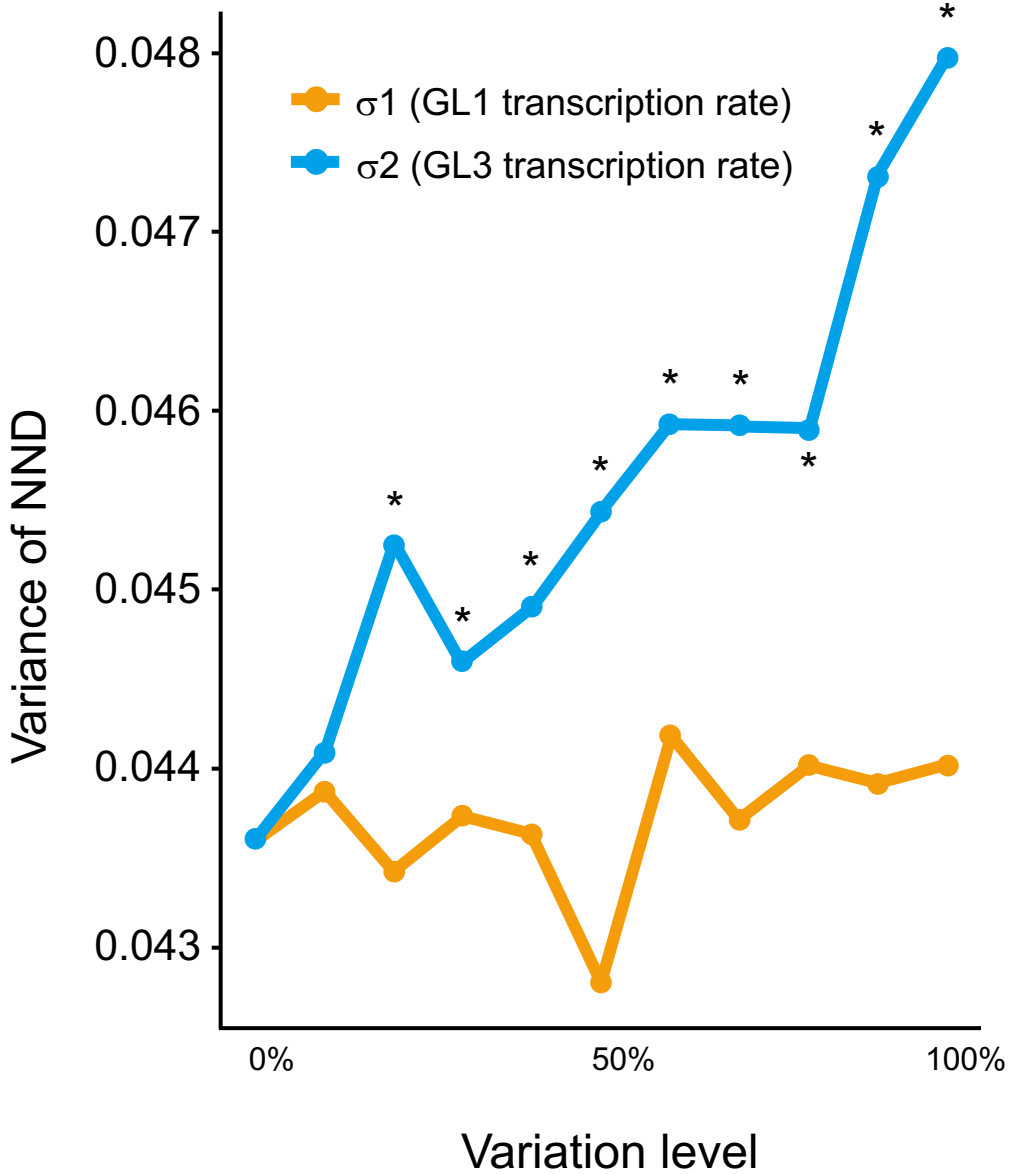

**Figure 3.** Effects of the degree of variation in each parameter. Variances of normalized next-neighbor distance (NND) increased proportionally with variations in  $\sigma_2$ , whereas  $\sigma_1$  was unaffected.

Fig. 4

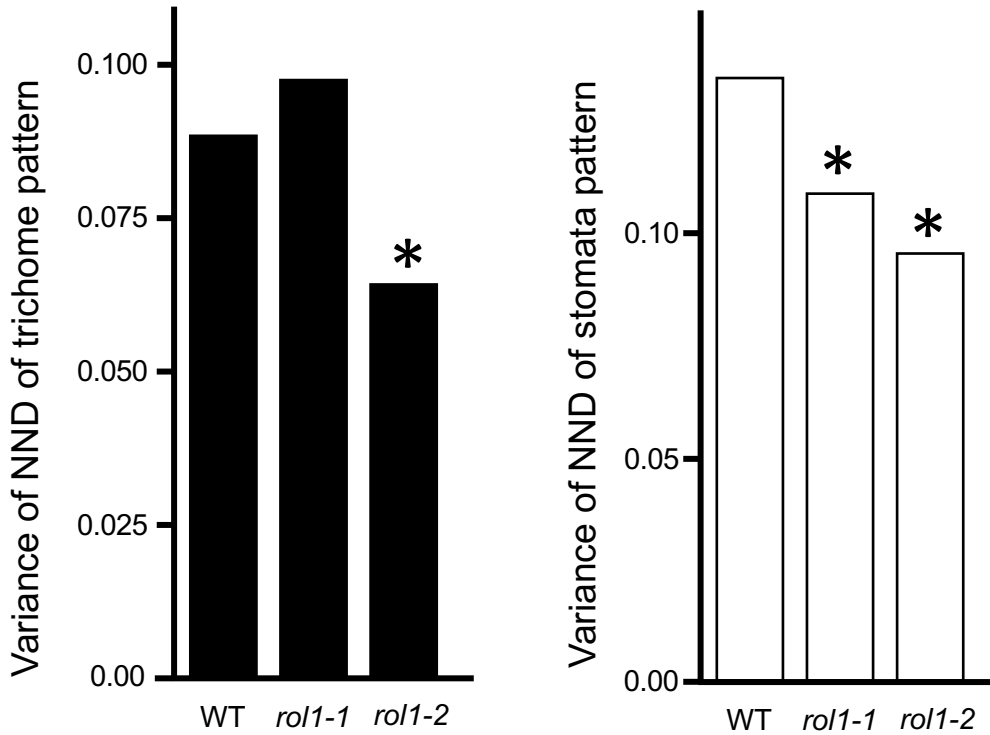

**Figure 4.** Normalized next-neighbor distance (NND) variances of trichomes and stomata of Columbia (Col) and *rol1* mutant. Two alleles of the *rol1* mutant showed increased regularity of stomata patterns (white); however, the trichome pattern showed no correlation (black). \* $P < 0.05$  (F test).

Fig. 5

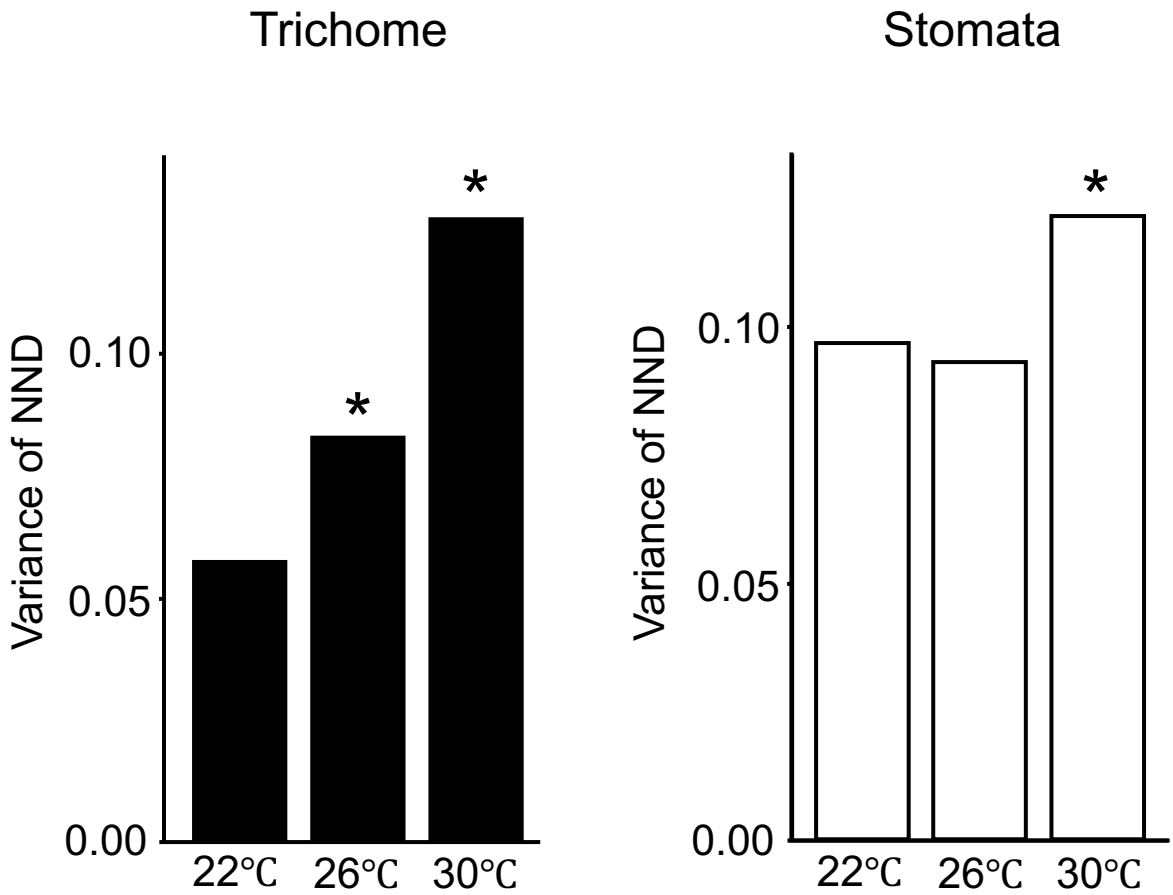

**Figure 5.** Normalized next-neighbor distance (NND) variances of trichomes and stomata of Col plants grown under mild heat stress. Variances of trichomes (black) and stomata (white) of Col plants grown at 22°C, 26°C, and 30°C are shown. NND variances of trichomes increased with the increase in temperature (black). \*P < 0.05 (F test)

Fig. 6

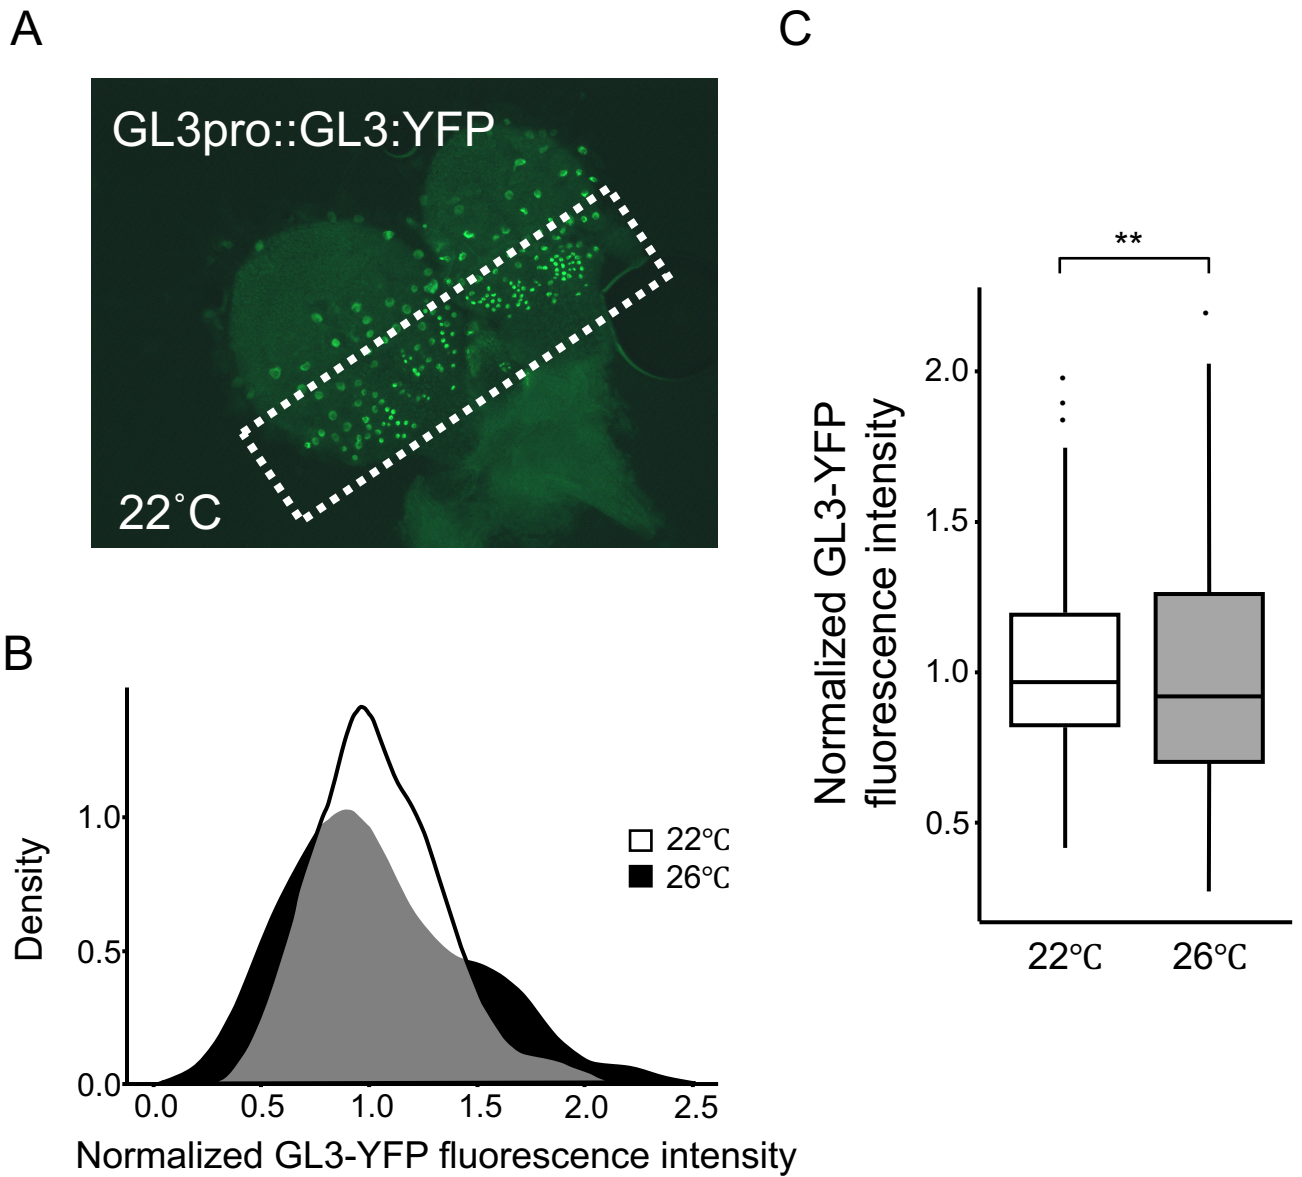

**Figure 6.** Variations in GL3 protein level. A) Representative image of GL3-YFP fluorescence signal. The GL3-YFP fluorescence intensity was measured from the area outlined by a white dotted line, which shows the initial cells in trichome development. B) Distribution of GL3-YFP fluorescence in plants grown at 22°C (white) and 26°C (black). C) Box plots of variances of intensities of normalized GL3-YFP fluorescence shown in panel B. \*\*P < 0.01.

Fig. 7

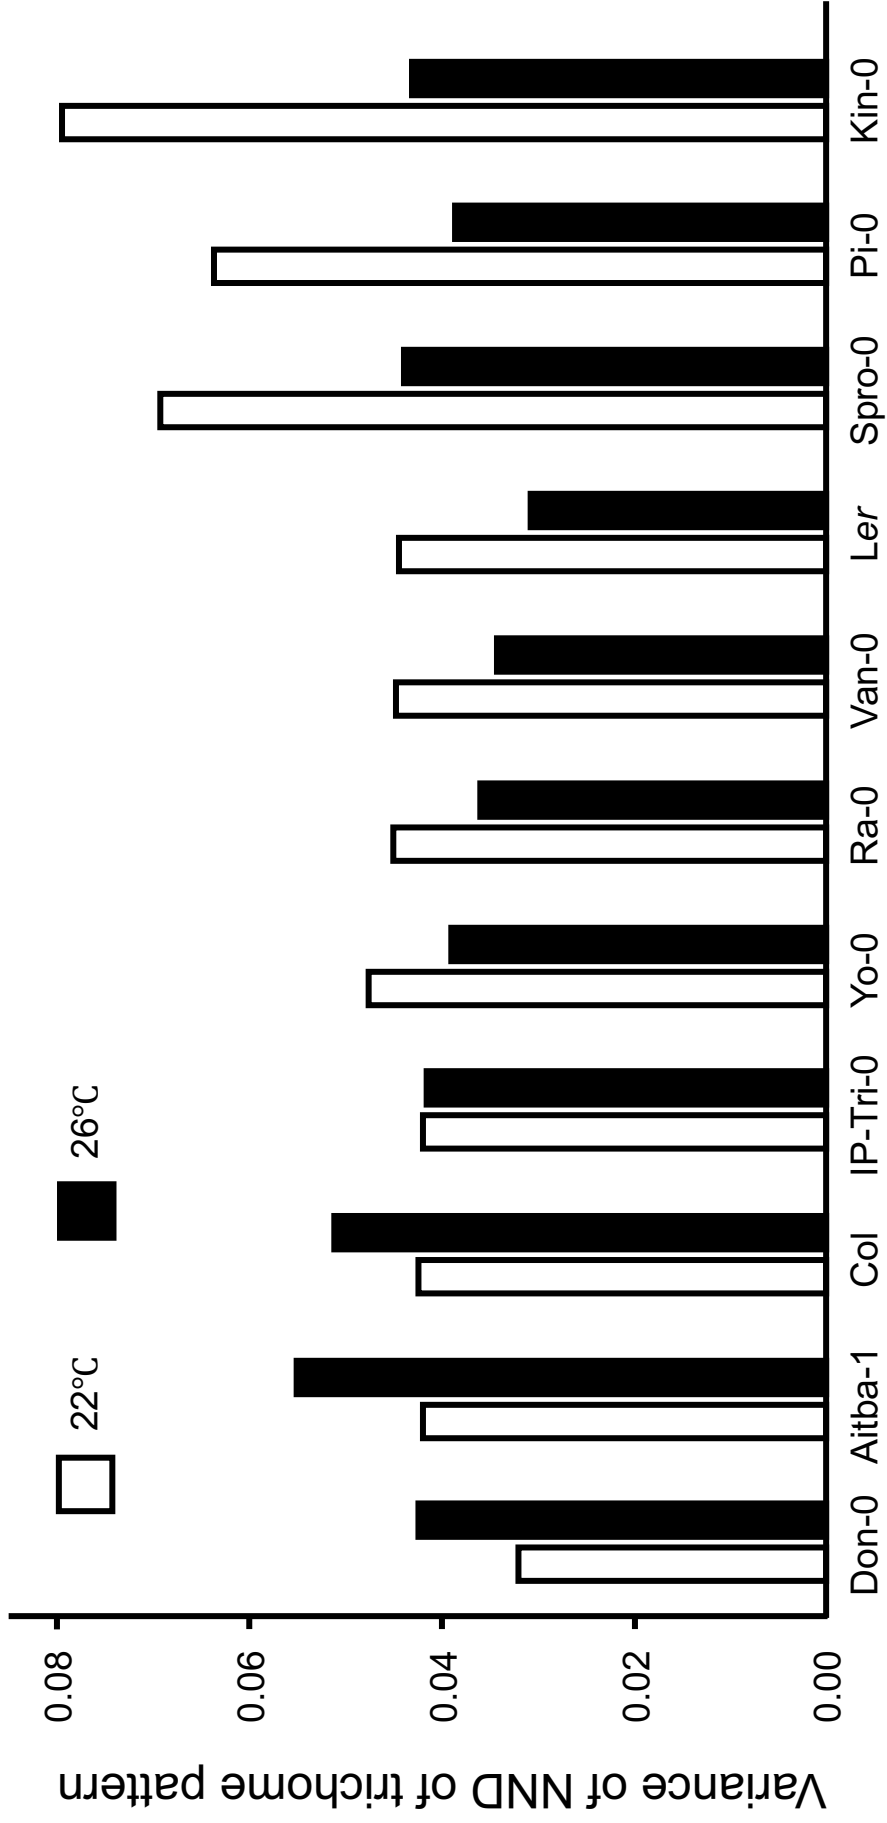

**Figure 7** .Normalized next-neighbor distance (NND) variances of trichomes of various Arabidopsis accessions grown under mild heat stress. NND variances of trichomes of Col, Ler, Van, and Kin plants grown at 22°C (white) and 26°C (black) are shown.



Fig. 8

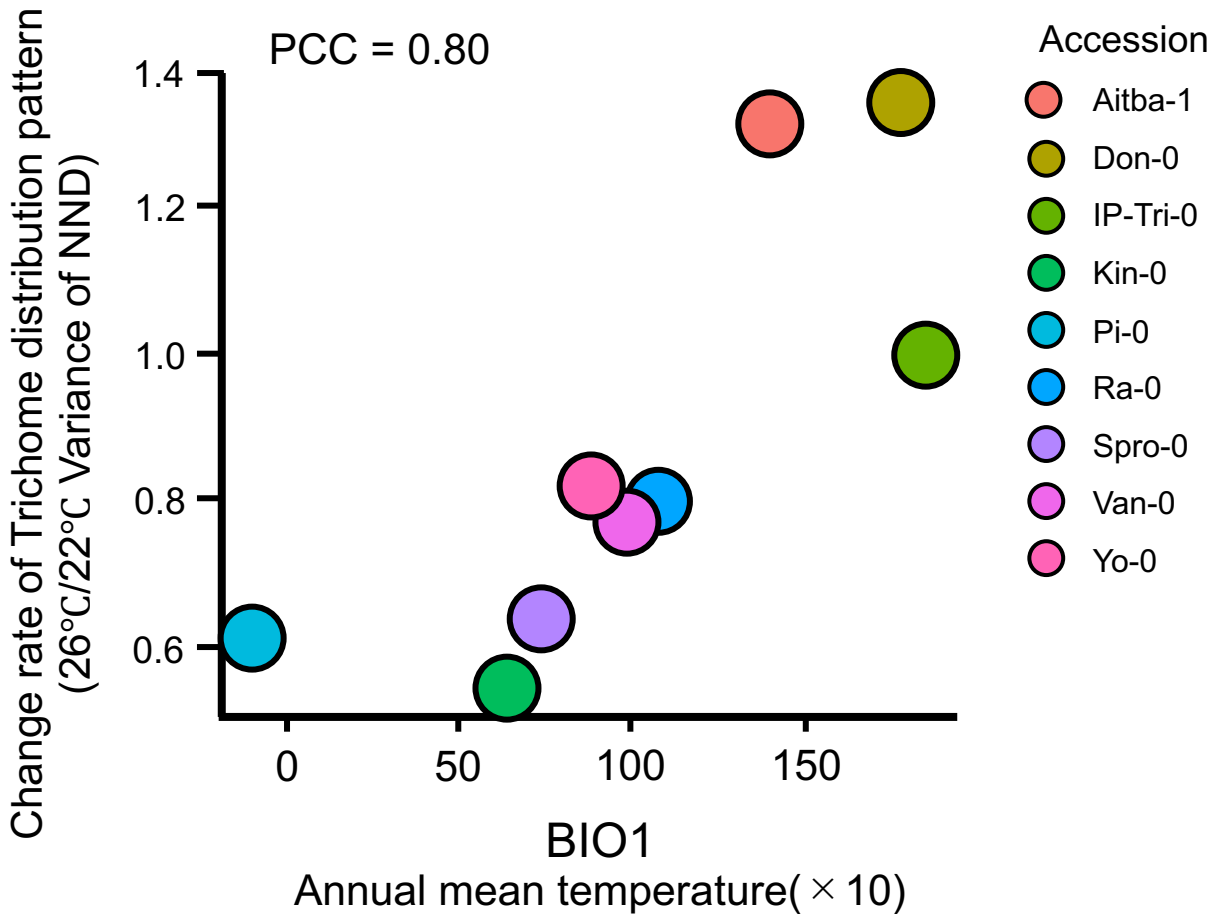

**Figure 8.** Relationship between gene expression variation and BioClim index. The ratios of NND variances of plants grown at 26°C relative to those of plants grown at 22°C are shown along the y-axis. The BIO1 index is shown along the x-axis. The values in the plots represent Pearson's correlation coefficients. Each accession is plotted using a different color.

Fig. 9

A

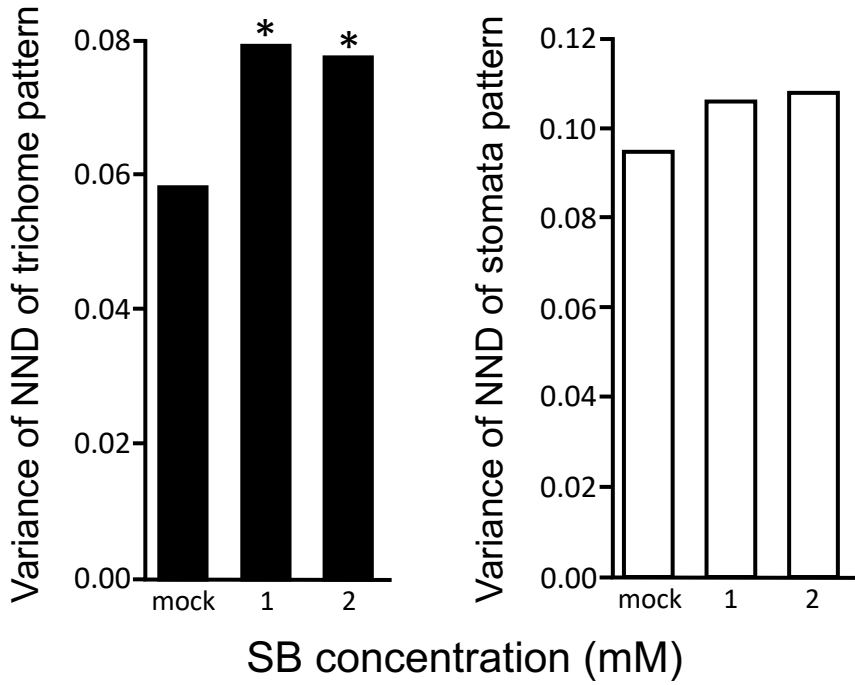

B

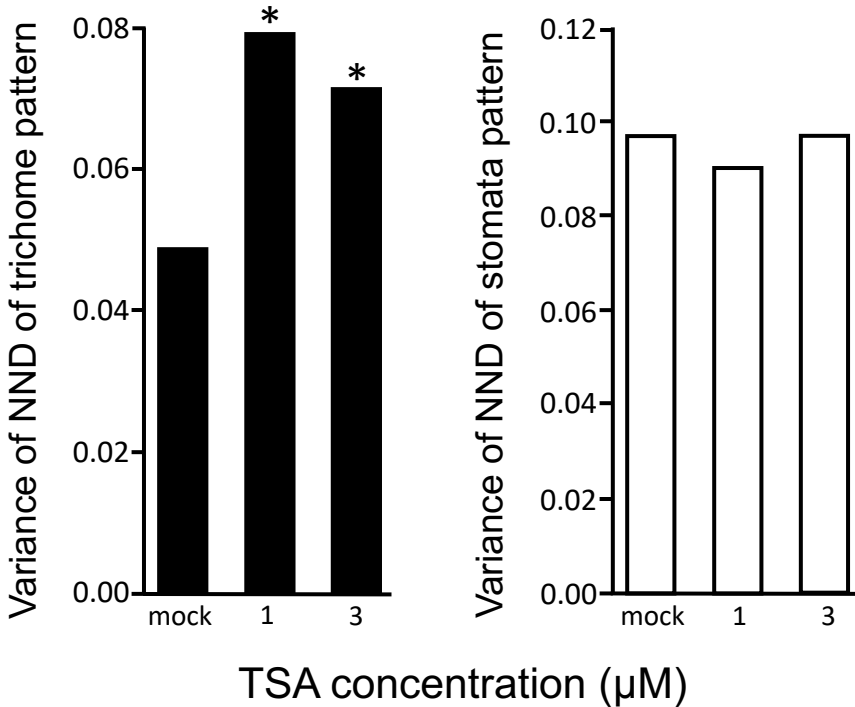

**Figure 9.** Normalized next-neighbor distance (NND) variances of trichome and stomata of Col plants treated with sodium butyrate (SB) and trichostatin A (TSA). A and B) Variances of trichomes (black) and stomata (white) of plants treated with SB (A) or TSA (B) are shown. \*P < 0.05 (F test).

Fig. 10

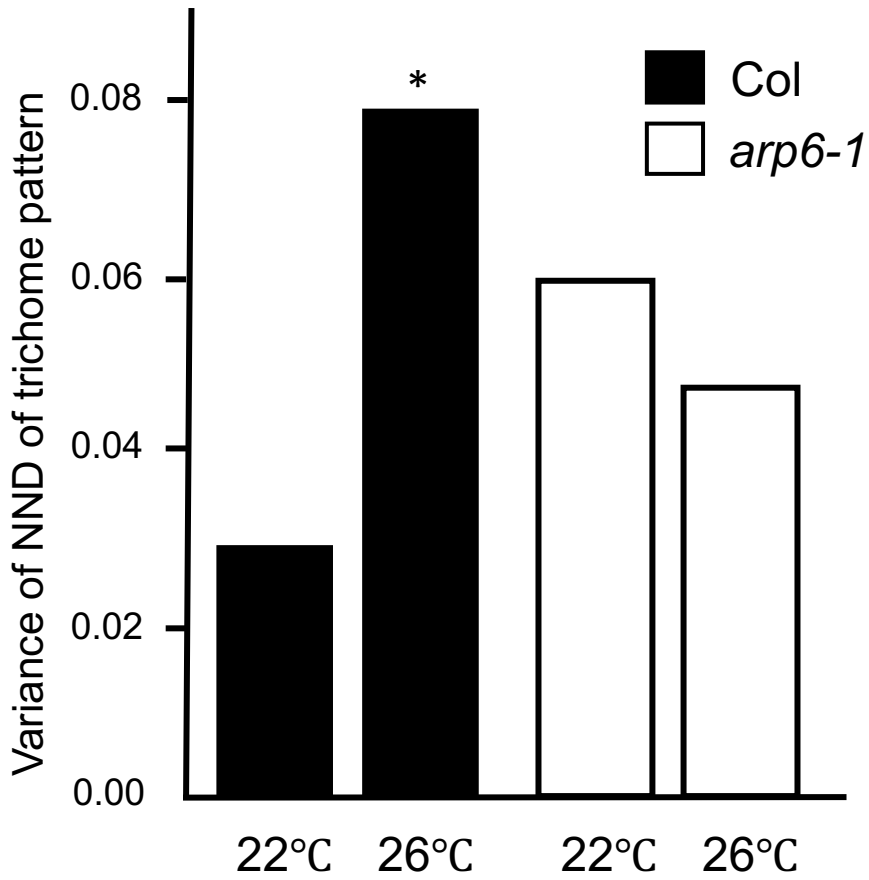

**Figure 10.** Normalized next-neighbor distance (NND) variances of trichomes in H2A.Z mutant. Variances of NND in the wild type (black) and *arp6-1* (white) are shown. \*P < 0.05 (F test).
